# Supplementary material
Source: MDPI journal article supplement (https://www.mdpi.com/2071-1050/15/7/5918)
Supplement: s1 [file s1]

## Supplemental Materials

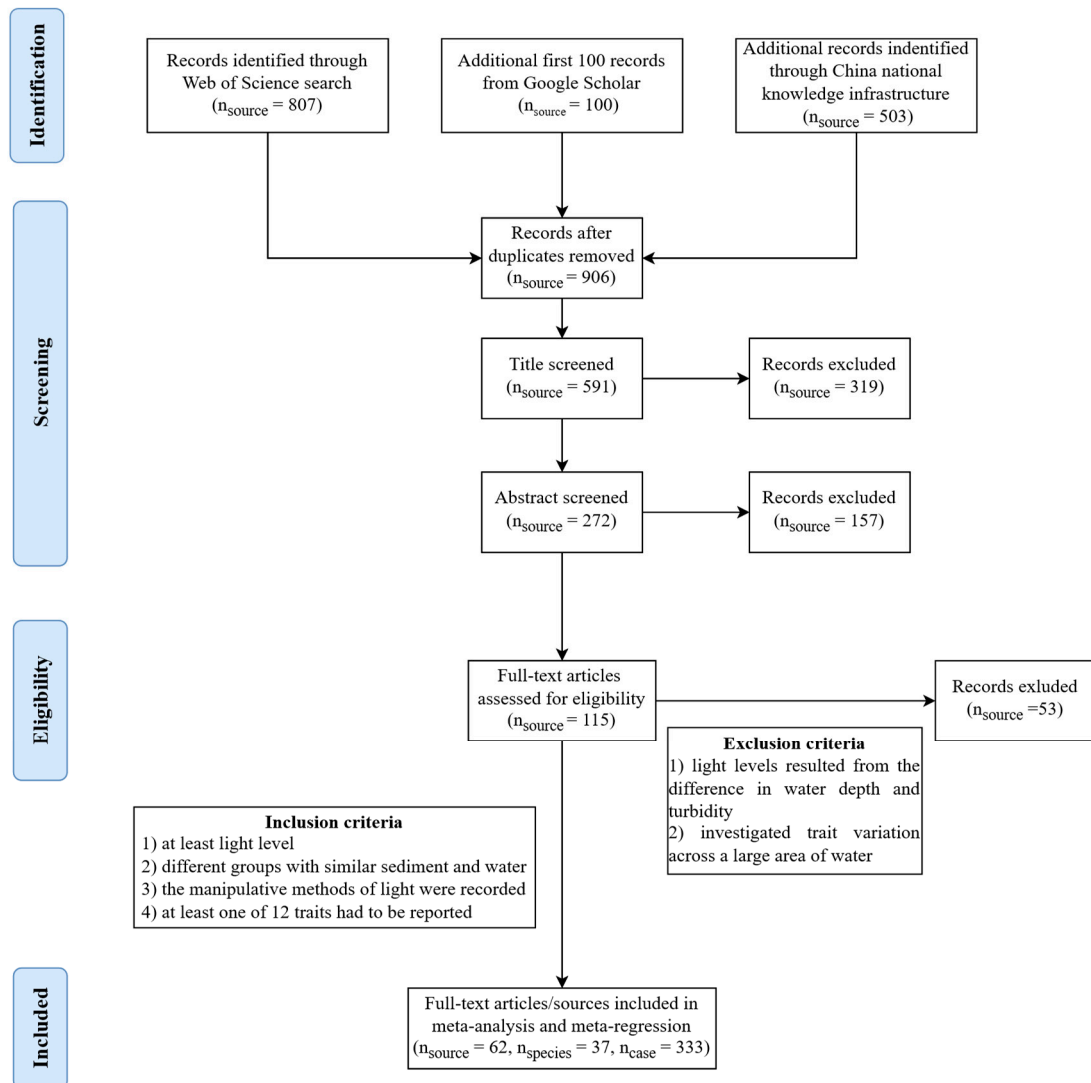

Figure S1 PRISMA flow chart showing the process of selecting publications.

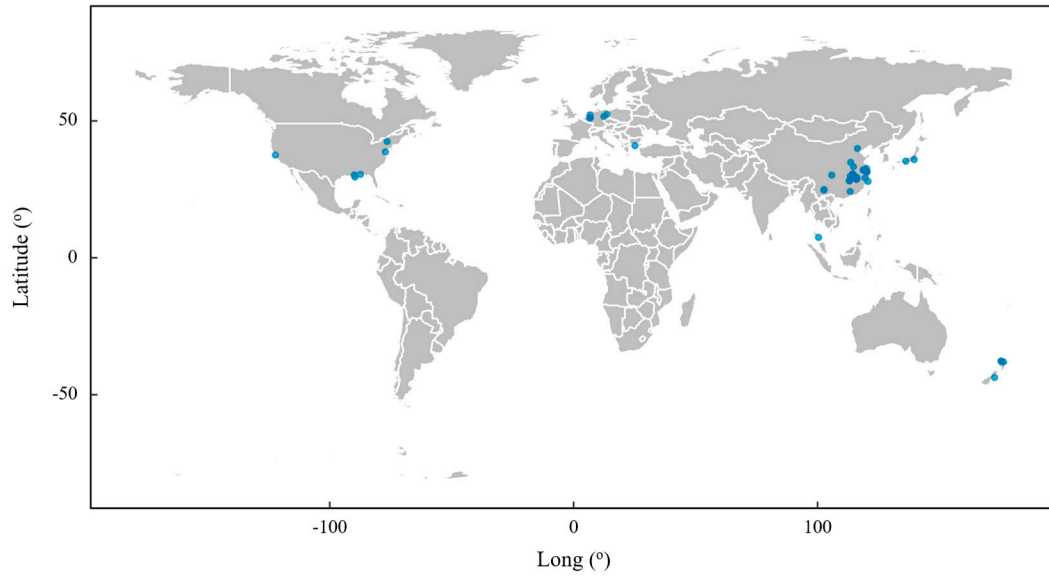

Figure S2 Geographical distribution of sampling sites of submerged plants in the study cases included in the meta-analysis.

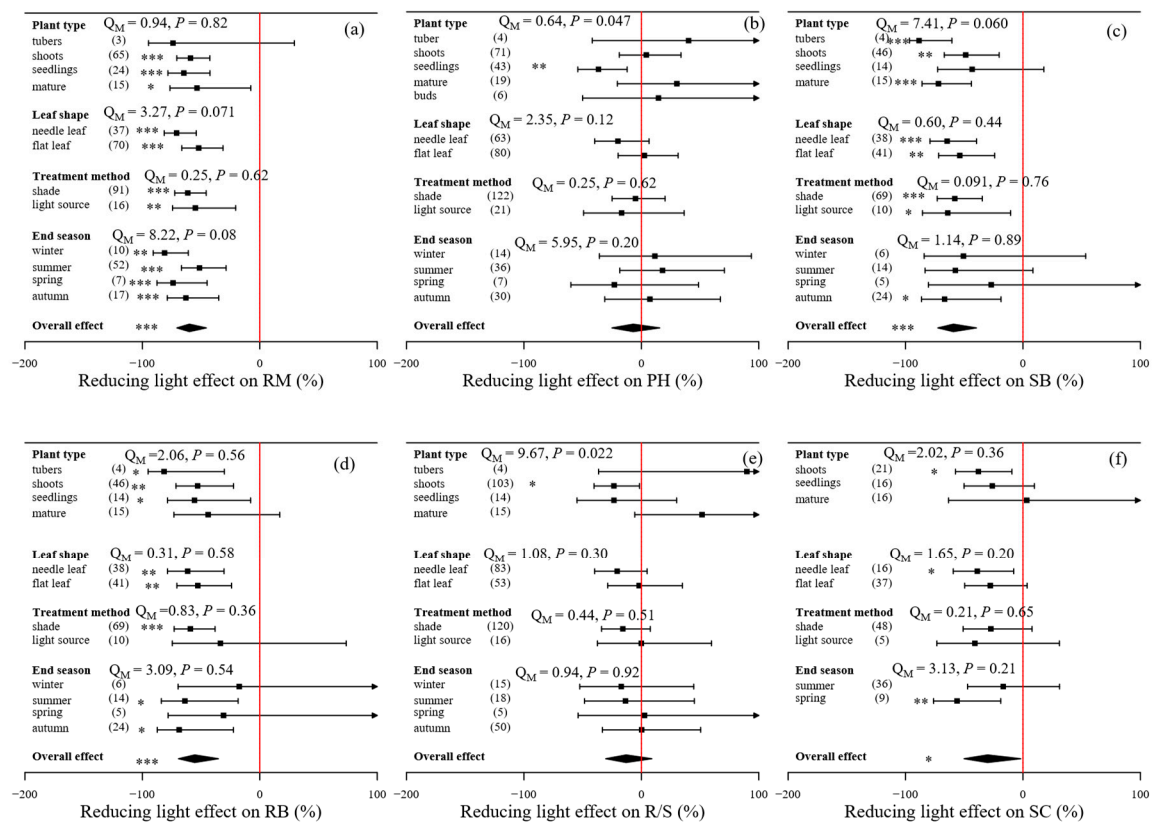

Figure S3 Meta-analysis of the effects of light reduction on the whole-plant traits across different moderators. RM: ramet number, PH: plant height, SB: shoot biomass, RB: root biomass, R/S: root-to-shoot ratio, SC: soluble carbohydrates. Overall effect and 95% confidence intervals of light reduction on each trait are given. Where the zero line (red solid line) is not crossed by the confidence intervals, the effect of light reduction was significant (shown by the asterisks, \*  $P < 0.05$ , \*\*  $P < 0.01$ , \*\*\*  $P < 0.001$ ). Arrows indicate 95% confidence intervals extending beyond the limits of the plot. Values in parentheses are sample sizes. The effects of moderators are tested by  $Q_M$  at the 0.05 level.

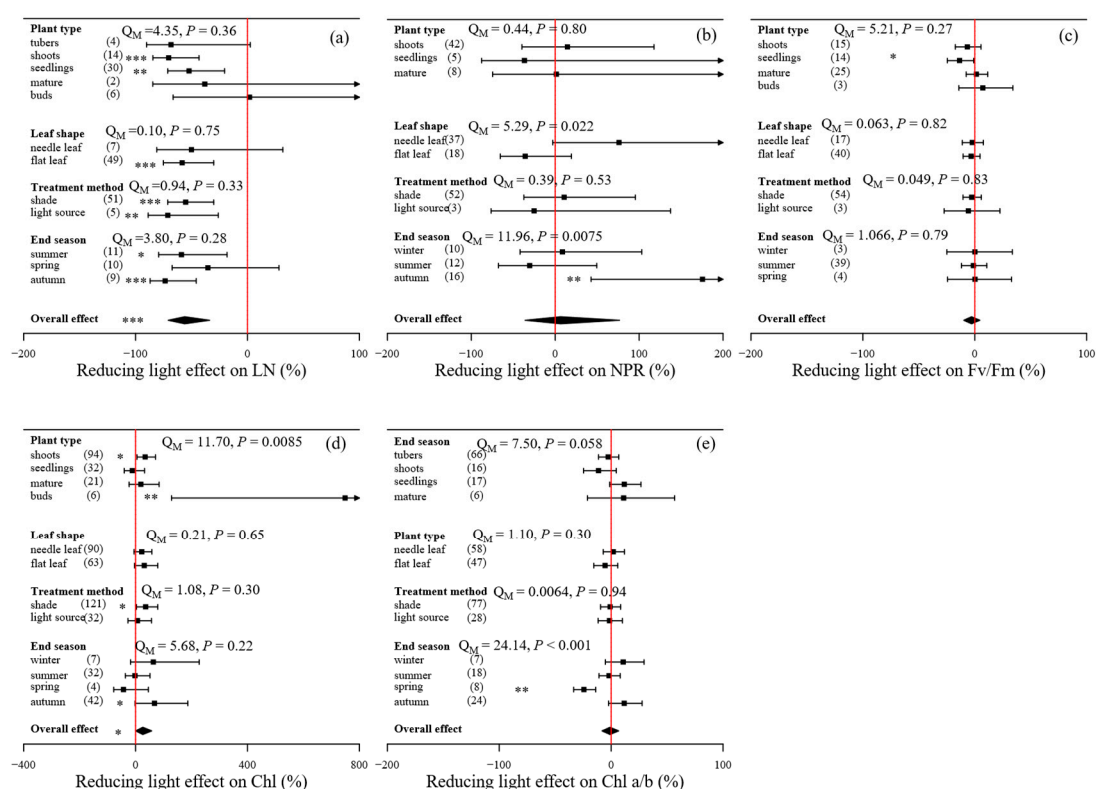

Figure S4 Meta-analysis of the effects of light reduction on the leaf traits across different plant moderators. LN: leaf number, NPR: net photosynthesis rate, Fv/Fm:

leaf maximal quantum yield of photosystem II complex, Chl: chlorophyll content, Chl a/b: chlorophyll a/b ratio. Overall effect and 95% confidence intervals of light reduction on each trait are given. Where the zero line (red solid line) is not crossed by the confidence intervals, the effect of light reduction was significant (shown by the asterisks, \*  $P < 0.05$ , \*\*  $P < 0.01$ , \*\*\*  $P < 0.001$ ). Arrows indicate 95% confidence intervals extending beyond the limits of the plot. Values in parentheses are sample sizes. The effects of moderators are tested by  $Q_M$  at the 0.05 level.

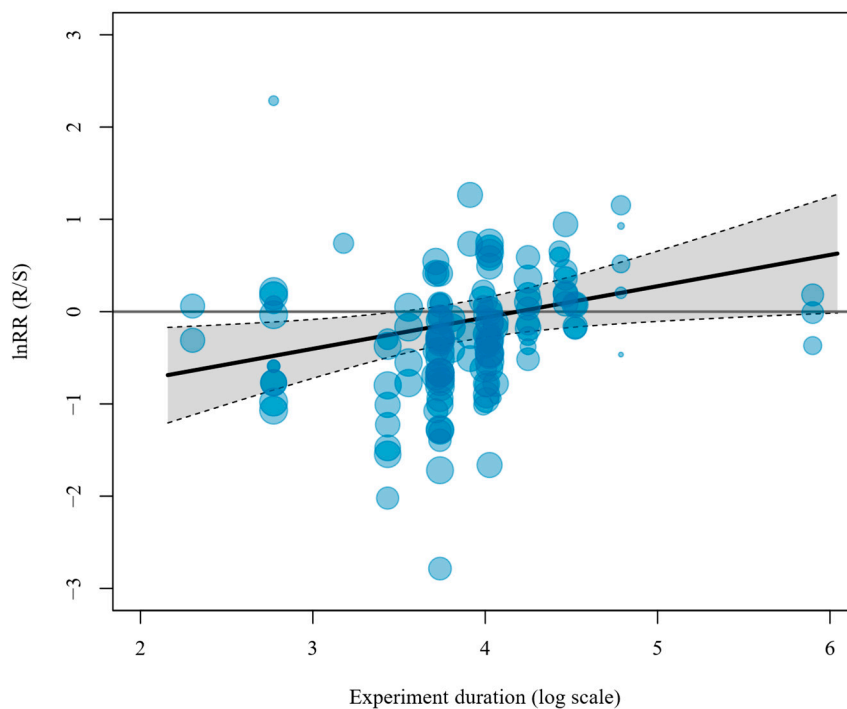

Figure S5 Relationship of lnRRs of submerged macrophytes root-to-shoot ratio (R/S) with the experimental period (log scale) in the meta-analysis.

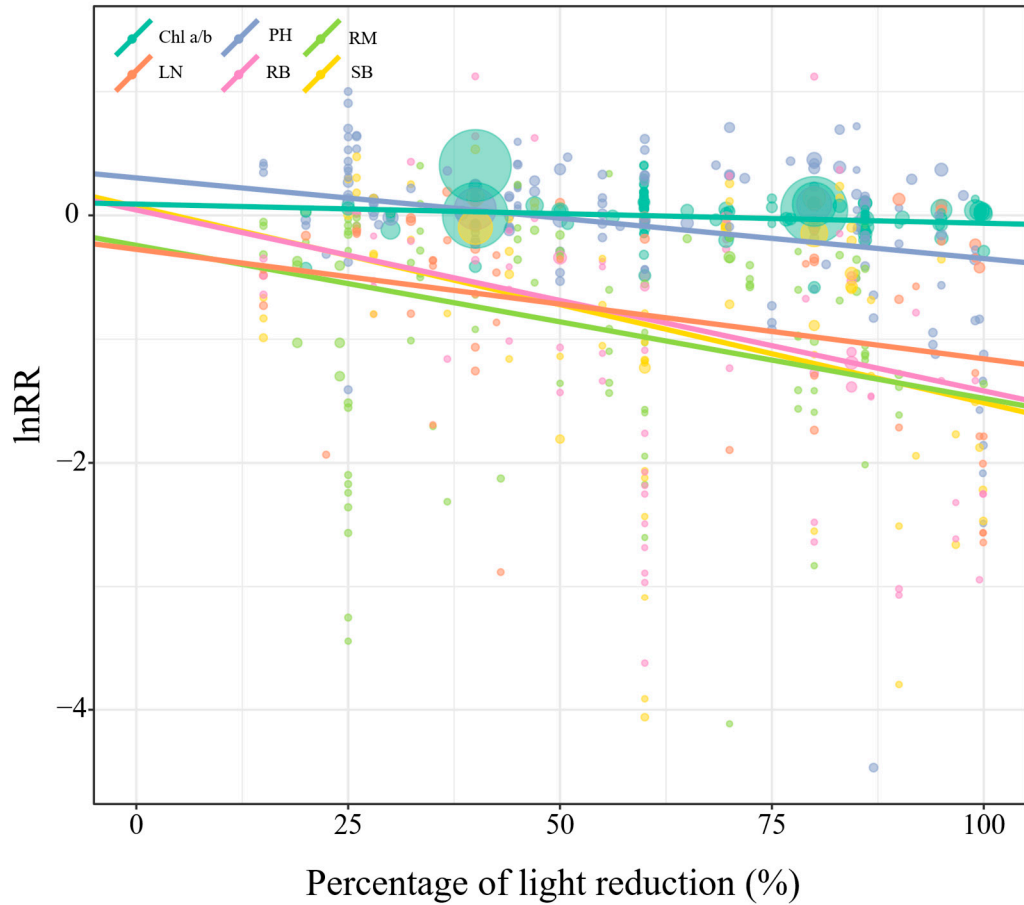

Figure S6 Relationships of  $\ln RR$ s of submerged macrophytes traits with the percentage of light reduction in the meta-analysis. RM: ramet number, PH: plant height, SB: shoot biomass, RB: root biomass, LN: leaf number, Chl a/b: chlorophyll a/b ratio.

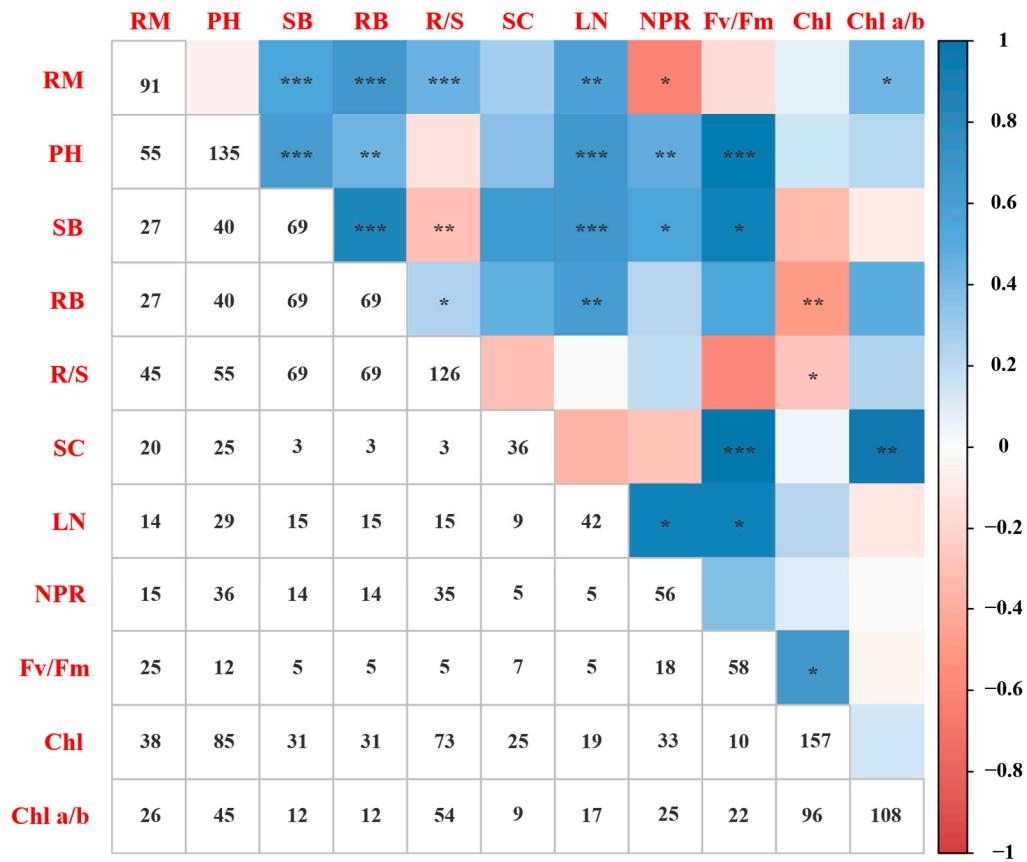

Figure S7 Heatmap of the Pearson's correlation coefficients between lnRRs of the paired whole-plants and leaf traits in the meta-analysis. The top-right of the matrix indicates the strength and direction of the correlation, and the bottom-left of the matrix indicates the number of observations (colors corresponding to the correlations). Significant level: \* $P < .05$ , \*\* $P < .01$ , \*\*\* $P < .001$ . RM: ramet number PH: plant height, R/S: root-to-shoot ratio, SB: shoot biomass, RB: root biomass, SC: soluble carbohydrates, LN: leaf number, NPR: net photosynthesis rate, Fv/Fm: leaf maximal quantum yield of photosystem II complex, Chl: chlorophyll content, Chl a/b: chlorophyll a/b ratio.

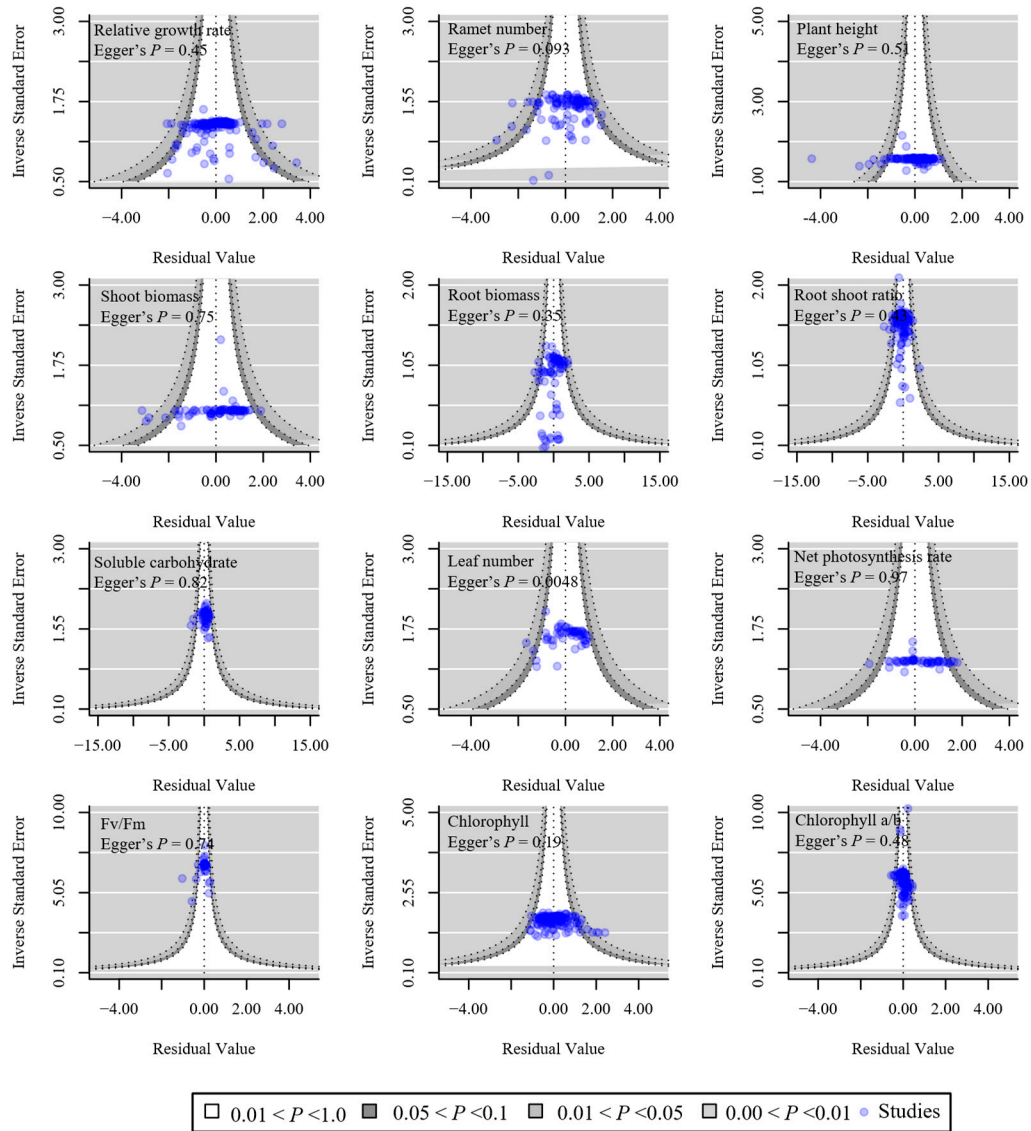

Figure S8 Contour-enhanced funnel plots for null-model residuals and  $P$  value of the Egger's test for lnRR of each variable. Shading colors in each plot represent the significance levels of the residual estimates. Funnel plot symmetry is detected by the Egger's test at 0.05 level.

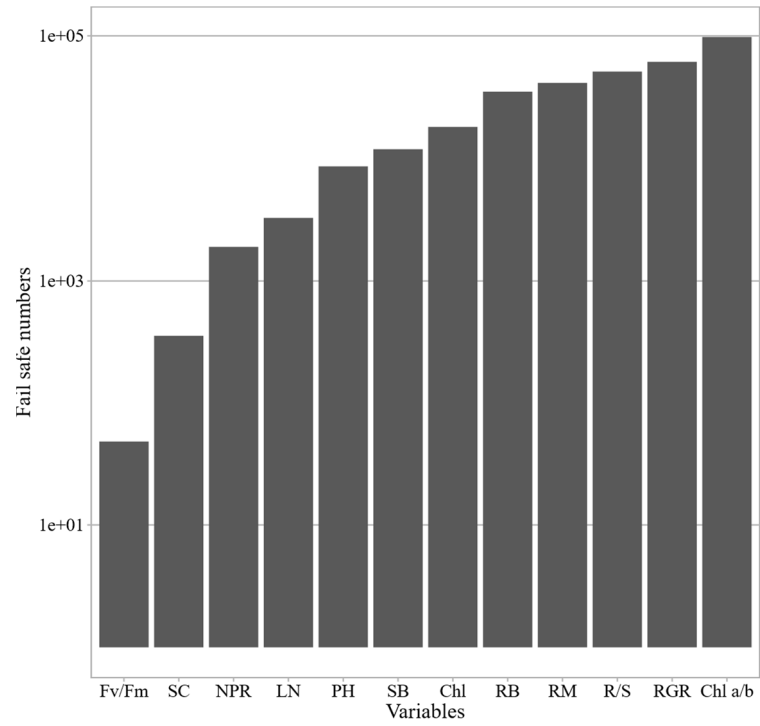

Figure S9 Bar plots of fail-safe numbers of each variable.



Table S1 List of primary studies, species and traits included in the meta-analysis

| No. | data source             | species                                                                                    | Traits                                    |
|-----|-------------------------|--------------------------------------------------------------------------------------------|-------------------------------------------|
| 1   | Carter et al., 1996     | <i>Vallisneria americana</i>                                                               | RGR                                       |
| 2   | Kurtz et al., 2003      | <i>Vallisneria americana</i>                                                               | SB, RB, R/S, LN, Chl,                     |
| 3   | Asaeda et al., 2004     | <i>Potamogeton perfoliatus</i>                                                             | SB, RB, R/S, PH, RM, NPR, Chl             |
| 4   | Boedeltje et al., 2005  | <i>Potamogeton alpinus</i>                                                                 | R/S, RM                                   |
| 5   | Li et al., 2005         | <i>Vallisneria natans</i>                                                                  | RGR                                       |
| 6   | Chen et al., 2006       | <i>Potamogeton crispus</i>                                                                 | Fv/Fm                                     |
| 7   | Li, 2006                | <i>Vallisneria natans</i>                                                                  | SC, LN                                    |
| 8   | Xiao, 2006              | <i>Potamogeton crispus</i>                                                                 | Fv/Fm, Chl a/b                            |
| 9   | Xiao et al. 2006        | <i>Potamogeton wrightii</i><br><i>Vallisneria natans</i>                                   | NPR, Fv/Fm, Chl a/b                       |
| 10  | Imamoto et al., 2007    | <i>Vallisneria natans</i><br><i>Potamogeton maackianus</i><br><i>Elodea nuttallii</i>      | PH, RGR                                   |
| 11  | Xie et al., 2007        | <i>Myriophyllum spicatum</i>                                                               | SB, RB, R/S                               |
| 12  | Chen et al., 2008       | <i>Potamogeton crispus</i>                                                                 | SB, RB, R/S, PH, LN, RM                   |
| 13  | Zhou et al., 2008       | <i>Potamogeton crispus</i>                                                                 | SB, RB, R/S, PH, LN, NPR, Fv/Fm,          |
| 14  | Zhou et al., 2008       | <i>Elodea nuttallii</i>                                                                    | PH, LN, Chl, Chl a/b                      |
| 15  | Zhu et al., 2008        | <i>Elodea canadensis</i><br><i>Myriophyllum spicatum</i><br><i>Heteranthera dubia</i>      | SB, RB, R/S, RM                           |
| 16  | Angelstein et al., 2009 | <i>Elodea nuttallii</i>                                                                    | RGR, Chl, Chl a/b                         |
| 17  | Cao et al., 2009        | <i>Potamogeton crispus</i>                                                                 | SB, RB, R/S, SC                           |
| 18* | Zhu, 2009               | <i>Hydrilla verticillata</i>                                                               | PH, RGR, RM, SC, NPR, Fv/Fm, Chl, Chl a/b |
| 19  | Sultana et al., 2010    | <i>Potamogeton perfoliatus</i>                                                             | SB, RB, R/S                               |
| 20* | Wang, 2010.             | <i>Vallisneria natans</i>                                                                  | SB, RB, R/S, Chl, RGR                     |
| 21  | Zhang et al., 2010      | <i>Potamogeton crispus</i>                                                                 | SC                                        |
| 22  | Cao et al., 2011        | <i>Ceratophyllum demersum</i><br><i>Myriophyllum spicatum</i><br><i>Vallisneria natans</i> | SC, RGR                                   |
| 23  | Zhu et al., 2011        | <i>Hydrilla verticillata</i>                                                               | PH, RM, SC, Chl, Chl a/b                  |
| 24  | Ge et al., 2012         | <i>Myriophyllum spicatum</i>                                                               | SC, RGR                                   |
| 25  | Riis et al., 2012       | <i>Egeria densa</i><br><i>Elodea canadensis</i><br><i>Lagarosiphon major</i>               | R/S, PH, RM, NPR, RGR                     |
| 26  | Yuan et al., 2012       | <i>Vallisneria spinulosa</i>                                                               | SB, RB, R/S, RM                           |
| 27  | Lu et al., 2013         | <i>Vallisneria natans</i><br><i>Myriophyllum spicatum</i>                                  | RM, Fv/Fm, RGR                            |

|    |                         |                                                                                                                                                                                                                          |                                |
|----|-------------------------|--------------------------------------------------------------------------------------------------------------------------------------------------------------------------------------------------------------------------|--------------------------------|
| 28 | Malheiro et al., 2013   | <i>Myriophyllum aquaticum</i>                                                                                                                                                                                            | SB, RB, R/S, Chl, Chl a/b, RGR |
| 29 | Zhao et al., 2013       | <i>Vallisneria natans</i>                                                                                                                                                                                                | SB, RB, R/S, PH, LN, RM        |
| 30 | Cao et al., 2014        | <i>Vallisneria natans</i>                                                                                                                                                                                                | LN, RM, Chl, Chl a/b           |
| 31 | Lang et al., 2014       | <i>Potamogeton wrightii</i><br><i>Stuckenia pectinata</i>                                                                                                                                                                | Fv/Fm                          |
| 32 | Zhao et al., 2014       | <i>Ottelia acuminata</i>                                                                                                                                                                                                 | PH                             |
| 33 | Eller et al., 2015      | <i>Elodea canadensis</i><br><i>Egeria densa</i><br><i>Hydrilla verticillata</i><br><i>Ceratophyllum demersum</i>                                                                                                         | R/S, PH, RM, Chl, Chl a/b, RGR |
| 34 | Hussner et al., 2015    | <i>Hydrilla verticillata</i><br><i>Egeria densa</i><br><i>Lagarosiphon major</i><br><i>Myriophyllum triphyllum</i>                                                                                                       | R/S, Chl, Chl a/b, RGR         |
| 35 | Hussner et al., 2015    | <i>Myriophyllum heterophyllum</i><br><i>Myriophyllum spicatum</i>                                                                                                                                                        | R/S, NPR, Chl, Chl a/b, RGR    |
| 36 | Song et al., 2015       | <i>Myriophyllum spicatum</i>                                                                                                                                                                                             | Chl                            |
| 37 | Lin et al., 2016        | <i>Stuckenia pectinata</i><br><i>Potamogeton maackianus</i><br><i>Potamogeton wrightii</i><br><i>Ceratophyllum demersum</i><br><i>Vallisneria natans</i><br><i>Hydrilla verticillata</i><br><i>Myriophyllum spicatum</i> | PH, RM, SC, Chl, RGR           |
| 38 | Zhang, 2016             | <i>Vallisneria natans</i>                                                                                                                                                                                                | PH, LN, RM, Chl, Chl a/b       |
| 39 | Cao et al., 2018        | <i>Potamogeton crispus</i>                                                                                                                                                                                               | PH, LN, Chl, Chl a/b           |
| 40 | Jiang et al., 2018      | <i>Hydrilla verticillata</i><br><i>Myriophyllum spicatum</i><br><i>Ceratophyllum demersum</i><br><i>Cabomba caroliniana</i><br><i>Vallisneria natans</i><br><i>Potamogeton wrightii</i>                                  | Fv/Fm                          |
| 41 | Li et al., 2018         | <i>Hydrilla verticillata</i><br><i>Vallisneria natans</i><br><i>Najas marina</i>                                                                                                                                         | Chl                            |
| 42 | Xue, 2018               | <i>Vallisneria natans</i><br><i>Elodea nuttallii</i>                                                                                                                                                                     | PH, Chl, Chl a/b               |
| 43 | Kankanamge et al., 2019 | <i>Egeria densa</i><br><i>Elodea canadensis</i><br><i>Ceratophyllum demersum</i><br><i>Nitella aff. Cristata</i>                                                                                                         | SB, RB, R/S, PH, NPR, Chl, RGR |
| 44 | He et al., 2019         | <i>Elodea nuttallii</i>                                                                                                                                                                                                  | SB, RB, R/S, PH, RM, RGR       |

|    |                            |                                                                                            |                                               |
|----|----------------------------|--------------------------------------------------------------------------------------------|-----------------------------------------------|
| 45 | Hillmann et al., 2019      | <i>Myriophyllum spicatum</i><br><i>Ruppia maritima</i>                                     | R/S, RGR                                      |
| 46 | Hu et al., 2019            | <i>Stuckenia pectinata</i>                                                                 | SB, RB, R/S                                   |
| 47 | Li et al., 2019            | <i>Vallisneria spirulosa</i>                                                               | PH, LN                                        |
| 48 | Tan et al., 2019           | <i>Myriophyllum spicatum</i><br><i>Potamogeton maackianus</i><br><i>Vallisneria natans</i> | PH, RM                                        |
| 49 | Zhang, 2019                | <i>Rotala rotundifolia</i>                                                                 | SB, RB, R/S, PH, LN, Chl,<br>Chl a/b          |
| 50 | Chen et al., 2020          | <i>Hydrilla verticillata</i><br><i>Vallisneria natans</i>                                  | SB, RB, R/S, PH, RM, SC,<br>Chl, RGR          |
| 51 | Chen et al., 2020          | <i>Potamogeton maackianus</i>                                                              | PH, LN                                        |
| 52 | Kankanamge et al.,<br>2020 | <i>Egeria densa</i><br><i>Elodea canadensis</i>                                            | SB, RB, R/S, PH, RGR                          |
| 53 | Yuan et al., 2020          | <i>Vallisneria spirulosa</i>                                                               | RM, RGR                                       |
| 54 | Chotikarn et al., 2021     | <i>Elodea canadensis</i>                                                                   | Fv/Fm, Chl, Chl a/b                           |
| 55 | Malea et al., 2021         | <i>Stuckenia pectinata</i>                                                                 | Chl, Chl a/b, RGR                             |
| 56 | Peng et al., 2021          | <i>Vallisneria natans</i>                                                                  | SB, RB, R/S, PH, LN, RM,                      |
| 57 | Yu et al., 2021            | <i>Vallisneria natans</i>                                                                  | LN, RM                                        |
| 58 | Chen et al., 2022          | <i>Vallisneria natans</i>                                                                  | SB, RB, R/S, LN, RM, SC,                      |
| 59 | Yuan et al., 2022          | <i>Vallisneria natans</i><br><i>Myriophyllum spicatum</i>                                  | SB, RB, R/S, PH, LN, RM,<br>Chl, Chl a/b, RGR |
| 60 | Yuan et al., 2022          | <i>Vallisneria spirulosa</i>                                                               | LN, RM                                        |

Note: \* denoted two different studies were in the same thesis. Considering the random effects in meta-analysis, we considered the two theses as four study literature.

## Reference:

1. Carter, V.; Rybicki, N.B.; Turtora, M. Effect of increasing photon irradiance on the growth of *Vallisneria americana* in the tidal Potomac River. *Aquatic Botany* **1996**, *54*, 337-345, doi:10.1016/0304-3770(96)01051-0.
2. Kurtz, J.C.; Yates, D.F.; Macauley, J.M.; Quarles, R.L.; Genthner, F.J.; Chancy, C.A.; Devereux, R. Effects of light reduction on growth of the submerged macrophyte *Vallisneria americana* and the community of root-associated heterotrophic bacteria. *Journal of Experimental Marine Biology and Ecology* **2003**, *291*, 199-218, doi:10.1016/S0022-0981(03)00120-5.
3. Asaeda, T.; Sultana, M.; Manatunge, J.; Fujino, T. The effect of epiphytic algae on the growth and production of *Potamogeton perfoliatus* L. in two light conditions. *Environmental and Experimental Botany* **2004**, *52*, 225-238, doi:10.1016/j.envexpbot.2004.02.001.
4. Boedeltje, G.; Smolders, A.J.P.; Roelofs, J.G.M. Combined effects of water column nitrate enrichment, sediment type and irradiance on growth and foliar nutrient concentrations of *Potamogeton alpinus*. *Freshwater Biology* **2005**, *50*, 1537-1547,

doi:10.1111/j.1365-2427.2005.01426.x.

5. Li, Y.; Yu, D.; Xu, X.; Xie, Y. Light intensity increases the susceptibility of *Vallisneria natans* to snail herbivory. *Aquatic Botany* **2005**, *81*, 265-275, doi:10.1016/j.aquabot.2005.01.005.
6. Chen, X.; Chen, K.; Xiao, Y.; Zhang, S.; Wang, Q. Effects of light and matrix on turion germination, seedling growth and leaf photosynthesis efficiency of *Potamogeton crispus*. *Chinese Journal of Applied Ecology* **2006**, *17*, 1413-1418 (Chinese article with English abstract).
7. Li, H. The influences of light, nutrition and phytoplankton on growth and physiology of submerged macrophytes in eutrophic waters. Graduate University of the Chinese Academy of Sciences, Beijing, 2006.
8. Xiao, Y. Effect of Main Environmental Factors on Photosynthesis of Three Submerged Macrophytes from taihu Lake. Nanjing Agriculture University, Nanjing, 2006 (Chinese thesis with English abstract).
9. Xiao, Y.; Chen, K.; Dai, X.; Chen, X.; Xu, X. Comparison of Adaptive Capacity to Low Light Intensity of Two Angiosperm Submerged Macrophytes from Taihu Lake. *Plant Physiology Communications* **2006**, *42*, 421-425 (Chinese article with English abstract).
10. Imamoto, H.; Horiya, K.; Yamasaki, M.; Washitani, I. An experimental system to study ecophysiological responses of submerged macrophytes to temperature and light. *Ecological Research* **2007**, *22*, 172-176, doi:10.1007/s11284-006-0013-0.
11. Xie, Y.; Luo, W.; Ren, B.; Li, F. Morphological and physiological responses to sediment type and light availability in roots of the submerged plant *Myriophyllum spicatum*. *Annals of Botany* **2007**, *100*, 1517-1523, doi:10.1093/aob/mcm236.
12. Chen, X.; Wang, Q.; Chen, K. Impacts of Different Light Intensity on Morphology and Structure of *Potamogeton crispus*. *Journal of Wuhan Botanical Research* **2008**, *26*, 163-169 (Chinese article with English abstract).
13. Zhou, X.; Wang, G.; Feng, B. Influence of the growth and photosynthetic characteristics of *Potamogeton crispus* in light. *Ecology and Environment* **2008**, *17*, 1342-1347 (Chinese article with English abstract).
14. Zhou, X.; Wang, G.; Feng, B. Effects of Light on Growth and Some Characteristics of Light-Energy Conversion of *Elodea nuttallii* Seedling. *Journal of Ecology and Rural Environment* **2008**, *24*, 46-52 (Chinese article with English abstract).
15. Zhu, B.; Mayer, C.M.; Rudstam, L.G.; Mills, E.L.; Ritchie, M.E. A comparison of irradiance and phosphorus effects on the growth of three submerged macrophytes. *Aquatic Botany* **2008**, *88*, 358-362, doi:10.1016/j.aquabot.2008.01.003.
16. Angelstein, S.; Schubert, H. Light acclimatisation of *Elodea nuttallii* grown under ambient DIC conditions. *Plant Ecology* **2009**, *202*, 91-101, doi:10.1007/s11258-008-9500-4.
17. Cao, T.; Xie, P.; Ni, L.; Zhang, M.; Xu, J. Carbon and nitrogen metabolism of an eutrophication tolerant macrophyte, *Potamogeton crispus*, under NH<sub>4</sub><sup>+</sup> stress and low light availability. *Environmental and Experimental Botany* **2009**, *66*, 74-78, doi:10.1016/j.envexpbot.2008.10.004.
18. Zhu, G. Effects of turbidity and low light intensity on the growth of macrophytes Nanjing Forestry University, Nanjing, 2009 (Chinese thesis with English abstract).
19. Sultana, M.; Asaeda, T.; Azim, M.E.; Fujino, T. Morphological plasticity of submerged

- macrophyte *Potamogeton wrightii* Morong under different photoperiods and nutrient conditions. *Chemistry and Ecology* **2010**, 26, 223-232, doi:10.1080/02757541003785841.
20. Wang, S. The combined effect of light and N, P on growth and physiology of *Vallisneria natans*. South China University of Technology, Guangzhou, 2010 (Chinese thesis with English abstract).
  21. Zhang, M.; Cao, T.; Ni, L.; Xie, P.; Li, Z. Carbon, nitrogen and antioxidant enzyme responses of *Potamogeton crispus* to both low light and high nutrient stresses. *Environmental and Experimental Botany* **2010**, 68, 44-50, doi:10.1016/j.envexpbot.2009.09.003.
  22. Cao, T.; Ni, L.; Xie, P.; Xu, J.; Zhang, M. Effects of moderate ammonium enrichment on three submersed macrophytes under contrasting light availability. *Freshwater Biology* **2011**, 56, 1620-1629, doi:10.1111/j.1365-2427.2011.02601.x.
  23. Zhu, D.; Qiao, N.; Li, M.; Chen, P. Effect of light intensity, temperature, total nitrogen concentration and their interaction on *Hydrilla Verticillata*. *Acta Hydrobiologica Sinica* **2011**, 35, 88-97 (Chinese article with English abstract).
  24. Ge, F.; Liu, B.; Lu, Z.; Gao, Y.; Wu, Z. Effects of Light Intensity on Growth and Phenolic Contents of *Myriophyllum spicatum*. *Environmental Science and Technology* **2012**, 35, 30-33,54 (Chinese article with English abstract).
  25. Riis, T.; Olesen, B.; Clayton, J.S.; Lambertini, C.; Brix, H.; Sorrell, B.K. Growth and morphology in relation to temperature and light availability during the establishment of three invasive aquatic plant species. *Aquatic Botany* **2012**, 102, 56-64, doi:10.1016/j.aquabot.2012.05.002.
  26. Yuan, L.; Li, W.; Liu, G.; Deng, G. Effects of different shaded conditions and water depths on the growth and reproductive strategy of *Vallisneria spinulosa*. *Pakistan Journal of Botany* **2012**, 44, 911-918.
  27. Lu, J.; Wang, Z.; Xing, W.; Liu, G. Effects of substrate and shading on the growth of two submerged macrophytes. *Hydrobiologia* **2013**, 700, 157-167, doi:10.1007/s10750-012-1227-5.
  28. Malheiro, A.C.E.; Jahns, P.; Hussner, A. CO<sub>2</sub> availability rather than light and temperature determines growth and phenotypical responses in submerged *Myriophyllum aquaticum*. *Aquatic Botany* **2013**, 110, 31-37, doi:10.1016/j.aquabot.2013.05.001.
  29. Zhao, C.; Li, H.; Luo, F. Effects of light heterogeneity on growth of a submerged clonal macrophyte. *Plant Species Biology* **2013**, 28, 156-164, doi:10.1111/j.1442-1984.2012.00372.x.
  30. Cao, J.; Lu, J.; Ruan, H. Effects of underwater illumination compensation on growth and physiological indices of submerged macrophyte *Vallisneria natans* L. *Journal of Nanjing Forestry University (Natural Sciences Edition)* **2014**, 38, 102-106 (Chinese article with English abstract).
  31. Lang, P.; Yuan, L.; Li, S. Effects of different light conditions on the photosynthesis of *Potamogeton malaianus* and *Potamogeton pectinatus*. *Jiangsu Agricultural Sciences* **2014**, 42, 323-325 (Chinese article with English abstract).
  32. Zhao, S.; Li, E.; Yang, J.; Wang, Z.; Wang, X.; Cai, X. Effects of light intensity on the seeds germination, seedlings growth and physiology of *Ottelia acuminata*. *Journal of*

- Lake Sciences* **2014**, 26, 107-112 (Chinese article with English abstract).
33. Eller, F.; Alnoee, A.B.; Boderskov, T.; Guo, W.-Y.; Kamp, A.T.; Sorrell, B.K.; Brix, H. Invasive submerged freshwater macrophytes are more plastic in their response to light intensity than to the availability of free CO<sub>2</sub> in air-equilibrated water. *Freshwater Biology* **2015**, 60, 929-943, doi:10.1111/fwb.12547.
  34. Hussner, A.; Hofstra, D.; Jahns, P.; Clayton, J. Response capacity to CO<sub>2</sub> depletion rather than temperature and light effects explain the growth success of three alien Hydrocharitaceae compared with native *Myriophyllum triphyllum* in New Zealand. *Aquatic Botany* **2015**, 120, 205-211, doi:10.1016/j.aquabot.2014.07.003.
  35. Hussner, A.; Jahns, P. European native *Myriophyllum spicatum* showed a higher use capacity than alien invasive *Myriophyllum heterophyllum*. *Hydrobiologia* **2015**, 746, 171-182, doi:10.1007/s10750-014-1976-4.
  36. Song, Y.; Kong, F.; Wang, M.; Zhang, Y. Effects of Light Intensity and Epiphytic Algae on Physiological Parameters of *Myriophyllum spicatum*. *Journal of Agro-Environment Science* **2015**, 34, 233-239 (Chinese article with English abstract).
  37. Lin, C.; Han, C.; Pan, H.; You, W.; Yan, H.; Chen, H. Effects of different light intensity on growth of the eight submerged plants. *Environment Engineering* **2016**, 34, 16-19 (Chinese article with English abstract).
  38. Zhang, S. The influence of *Vallisneria natans* growth under water gradient/light intensity. Jiangxi Normal University, Nanchang, 2016 (Chinese thesis with English abstract).
  39. Cao, Y.; Luo, S.; Chen, B. Effects of light intensity on growth and antioxidant enzyme activity of *Potamogeton crispus*. *Acta Hydrobiologica Sinica* **2018**, 42, 846-853 (Chinese article with English abstract).
  40. Jiang, H.; Zhang, Y.; Yin, L.; Li, W.; Jin, Q.; Fu, W.; Zhang, T.; Huang, W. Diurnal changes in photosynthesis by six submerged macrophytes measured using fluorescence. *Aquatic Botany* **2018**, 149, 33-39, doi:10.1016/j.aquabot.2018.05.003.
  41. Li, P.; Zhu, Z.; Yan, Y.; An, S.; Leng, X. Effects of different light intensity and sediment nutrition on three submerged macrophytes. *Ecologic Science* **2018**, 37, 101-107 (Chinese article with English abstract).
  42. Xue, R. Effect of Light Conditions on Growth Characteristic of Two Submersed Macrophyte. Chongqing University, Chongqing, 2018 (Chinese thesis with English abstract).
  43. Kankanamge, C.E.; Matheson, F.E.; Riis, T. Shading constrains the growth of invasive submerged macrophytes in streams. *Aquatic Botany* **2019**, 158, doi:10.1016/j.aquabot.2019.06.004.
  44. He, L.; Bakker, E.S.; Nunez, M.M.A.; Hilt, S. Combined effects of shading and clipping on the invasive alien macrophyte *Elodea nuttallii*. *Aquatic Botany* **2019**, 154, 24-27, doi:10.1016/j.aquabot.2018.11.014.
  45. Hillmann, E.R.; La Peyre, M.K. Effects of salinity and light on growth and interspecific interactions between *Myriophyllum spicatum* L. and *Ruppia maritima* L. *Aquatic Botany* **2019**, 155, 25-31, doi:10.1016/j.aquabot.2019.02.007.
  46. Hu, Q.; Turnbull, M.; Hawes, I. Estimated light compensation depth explains growth of *Stuckenia pectinata* in Te Waihora. *Aquatic Botany* **2019**, 156, 57-64,

doi:10.1016/j.aquabot.2019.04.005.

47. Li, L.; Ding, M.; Lan, Z.; Zhao, Y.; Chen, J. Light Availability and Patterns of Allocation to Reproductive and Vegetative Biomass in the Sexes of the Dioecious Macrophyte *Vallisneria spirulosa*. *Frontiers in Plant Science* **2019**, *10*, doi:10.3389/fpls.2019.00572.
48. Tan, X.; Yuan, G.; Fu, H.; Peng, H.; Ge, D.; Lou, Q.; Zhong, J. Effects of ammonium pulse on the growth of three submerged macrophytes. *Plos One* **2019**, *14*, doi:10.1371/journal.pone.0219161.
49. Zhang, X. Study on the influence of environmental on the growth of submerged *Rotala rotundifolia*. Wenzhou University, Wenzhou, 2019 (Chinese thesis with English abstract).
50. Chen, J.; Liu, Z.; Xiao, S.; Chen, R.; Luo, C.; Zhu, T.; Cao, T.; Ni, L.; Xie, P.; Su, H.; et al. Effects of benthivorous fish disturbance on chlorophyll a contents in water and the growth of two submersed macrophytes with different growth forms under two light regimes. *Science of The Total Environment* **2020**, *704*, 135269, doi:10.1016/j.scitotenv.2019.135269.
51. Chen, J.; Ren, W.; Chou, Q.; Su, H.; Ni, L.; Zhang, M.; Liu, Z.; Xie, P. Alterations in biomass allocation indicate the adaptation of submersed macrophytes to low-light stress. *Ecological Indicators* **2020**, *113*, 106235, doi:10.1016/j.ecolind.2020.106235.
52. Kankanamge, C.E.; Matheson, F.E.; Riis, T. Shading may alter the colonization pattern and dominance between two invasive submerged aquatic plant species. *Aquatic Ecology* **2020**, *54*, 721-728, doi:10.1007/s10452-020-09770-0.
53. Yuan, G.; Fu, H.; Zhang, M.; Lou, Q.; Dai, T.; Jeppesen, E. Effects of plant size on the growth of the submersed macrophyte *Vallisneria spirulosa* S.Z.Yan at different light intensities: implications for lake restoration. *Hydrobiologia* **2020**, *847*, 3609-3619, doi:10.1007/s10750-020-04374-z.
54. Chotikarn, P.; Kaewchana, P.; Prathep, A.; Roekngandee, P.; Sinutok, S. Effect of in situ experiment shading on the photosynthesis of Canadian waterweed (*Elodea canadensis*) from Songkhla Lagoon, Thailand. *Applied Ecology and Environmental Research* **2021**, *19*, 2593-2604, doi:10.15666/aeer/1903\_25932604.
55. Malea, L.; Nakou, K.; Papadimitriou, A.; Exadactylos, A.; Orfanidis, S. Physiological Responses of the Submerged Macrophyte *Stuckenia pectinata* to High Salinity and Irradiance Stress to Assess Eutrophication Management and Climatic Effects: An Integrative Approach. *Water* **2021**, *13*, doi:10.3390/w13121706.
56. Peng, H.; Ge, D.B.; Yuan, G.X.; Zou, D.S.; Fu, H.; Jeppesen, E. Effect of clonal fragmentation on the growth of *Vallisneria natans* (Lour.) Hara at contrasting nutrient and light conditions. *Hydrobiologia* **2021**, *848*, 903-912, doi:10.1007/s10750-020-04499-1.
57. Yu, Y.X.; Li, Y.; Wang, H.; Wu, X.; Zhang, M.; Wang, H.; Hamilton, D.; Jeppesen, E. Submersed macrophyte restoration with artificial light-emitting diodes: A mesocosm experiment. *Ecotoxicology and Environmental Safety* **2021**, *228*, doi:10.1016/j.ecoenv.2021.113044.
58. Chen, J.; Chou, Q.; Ren, W.; Su, H.; Zhang, M.; Cao, T.; Zhu, T.; Ni, L.; Liu, Z.; Xie, P. Growth, morphology and C/N metabolism responses of a model submersed macrophyte, *Vallisneria natans*, to various light regimes. *Ecological Indicators* **2022**, *136*, doi:10.1016/j.ecolind.2022.108652.

59. Yuan, G.; Yang, Z.; Sun, L.; Fu, H.; Peng, H.; Jeppesen, E. Asexual reproduction for overwintering of the submersed macrophyte *Vallisneria spinulosa* at different light intensities. *Aquatic Sciences* **2022**, *84*, doi:10.1007/s00027-021-00846-z.
60. Yuan, J.; Bai, Z.; Ye, S.; Liu, H.; Wang, Y.; Li, F.; Xie, Y.; Gao, A.; Wu, A. High-light inhibition of two submerged macrophytes in a shallow water experiment. *AoB Plants* **2022**, *14*, doi:10.1093/aobpla/plac009.
